# Supplementary material
Source: PubMed Central journal article supplement (PMC7274588)
Supplement: mmc1.pdf [file mmc1.pdf]

**MEDJ, Volume 1**

**Supplemental Information**

**Outcomes of Hydroxychloroquine Usage in United  
States Veterans Hospitalized with COVID-19**

**Joseph Magagnoli, Siddharth Narendran, Felipe Pereira, Tammy H. Cummings, James W.  
Hardin, S. Scott Sutton, and Jayakrishna Ambati**

## **Supplementary material**

**Figure S1:** Distribution of Study cohorts and outcomes in the subcohort of 425 hospitalized COVID-19 patients, related to Figure 1

**Table S2:** Treatment outcomes in the subcohort of 425 hospitalized COVID-19 patients, related to Table 2

**Table S3:** Adjusted Hazard Ratios for the subcohort of 425 hospitalized COVID-19 patients using the time-dependent Cox Proportional Hazards model after propensity score adjustment, related to Table 3

**Table S4:** ICD-10-PCS and CPT codes used to define mechanical and invasive ventilation, related to STAR methods section “outcomes and exposure codes”

**Figure S1: Distribution of study cohorts and outcomes in the subcohort of 425 hospitalized COVID-19 patients, related to Figure 1**

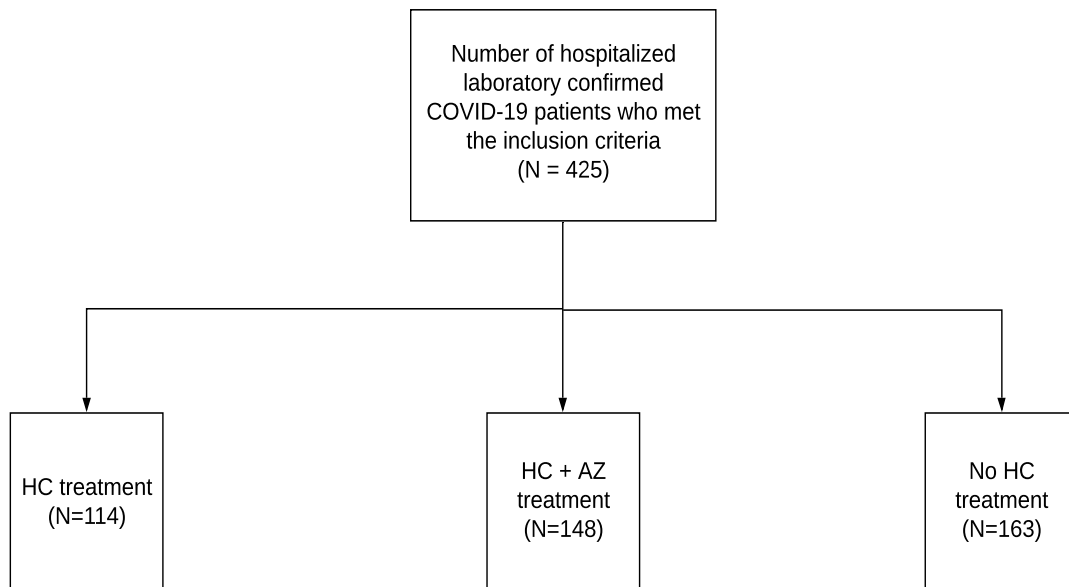

Abbreviation: HC, Hydroxychloroquine; AZ, Azithromycin;

**Table S2: Treatment outcomes in the subcohort of 425 hospitalized COVID-19 patients, related to Table 2**

| <b>HC treatment initiated at any time during the hospitalization period</b>      |                   |                       |                      |                |
|----------------------------------------------------------------------------------|-------------------|-----------------------|----------------------|----------------|
| <b>Outcome</b>                                                                   | <b>HC (n=114)</b> | <b>HC+ AZ (n=148)</b> | <b>No HC (n=163)</b> | <b>P value</b> |
| Death - No. (%)                                                                  | 30(26.3)          | 39(26.4)              | 18(11.1)             | <0.001         |
| Discharge - No. (%)                                                              | 84(73.7)          | 109(73.7)             | 145(89.0)            | <0.001         |
| <b>HC treatment initiated before mechanical ventilation<sup>a,b</sup></b>        |                   |                       |                      |                |
| <b>Outcome</b>                                                                   | <b>HC (n=99)</b>  | <b>HC+AZ (n=117)</b>  | <b>No HC (n=209)</b> | <b>P value</b> |
| Ventilation - No. (%)                                                            | 20(20.2)          | 21(18.0)              | 57(27.3)             | 0.12           |
| Death before mechanical ventilation - No. (%)                                    | 6(6.1)            | 5(4.3)                | 14(6.7)              | 0.67           |
| Death after mechanical ventilation - No. (%)                                     | 13 (13.1)         | 14 (12.0)             | 35 (16.8)            | 0.45           |
| Overall Death <sup>c</sup> – No. (%)                                             | 19 (19.2)         | 19 (16.2)             | 49 (23.4)            | 0.28           |
| Discharge before mechanical ventilation - No. (%)                                | 73(73.7)          | 91(77.8)              | 138(66.0)            | 0.06           |
| Discharge after mechanical ventilation - No. (%)                                 | 7 (7.1)           | 7 (6.0)               | 22 (10.5)            | 0.31           |
| <b>HC treatment initiated before invasive mechanical ventilation<sup>a</sup></b> |                   |                       |                      |                |
| <b>Outcome</b>                                                                   | <b>HC (n=98)</b>  | <b>HC+AZ (n=116)</b>  | <b>No HC (n=211)</b> | <b>P value</b> |
| Invasive ventilation - No. (%)                                                   | 19(19.4)          | 20(17.2)              | 45(21.3)             | 0.67           |
| Death before invasive ventilation - No. (%)                                      | 6(6.1)            | 5(4.3)                | 15(7.1)              | 0.60           |
| Death after invasive ventilation - No. (%)                                       | 14 (14.3)         | 16(13.8)              | 31(14.7)             | 0.98           |
| Overall Death <sup>c</sup> – No. (%)                                             | 20 (20.4)         | 21 (18.1)             | 46 (21.8)            | 0.73           |
| Discharge before invasive ventilation - No. (%)                                  | 73(74.5)          | 91(78.5)              | 151(71.6)            | 0.40           |
| Discharge after invasive ventilation - No. (%)                                   | 5 (5.1)           | 4 (3.5)               | 14 (6.6)             | 0.47           |
| <b>HC treatment initiated after mechanical ventilation<sup>b,d</sup></b>         |                   |                       |                      |                |
| <b>Outcome</b>                                                                   | <b>HC (n=23)</b>  | <b>HC+AZ (n=23)</b>   | <b>No HC (n=11)</b>  | <b>P value</b> |
| Death - No. (%)                                                                  | 15(65.2)          | 16(69.6)              | 4(36.4)              | 0.16           |
| Discharge - No. (%)                                                              | 8(34.8)           | 7(30.4)               | 7(63.6)              | 0.16           |

Abbreviation: HC, Hydroxychloroquine; AZ, Azithromycin

<sup>a</sup> Patients may be in more than one category (e.g. Ventilation and Discharge after mechanical ventilation)

<sup>b</sup> Mechanical ventilation includes both non-invasive and invasive mechanical ventilation

<sup>c</sup> Overall death includes patients who died before and after mechanical ventilation

<sup>d</sup> Patients who received hydroxychloroquine before mechanical ventilation were excluded

**Table S3: Adjusted Hazard Ratios for the subcohort of 425 hospitalized COVID-19 patients using the time-dependent Cox Proportional Hazards model after propensity score adjustment, related to Table 3**

|       |           | Mechanical ventilation <sup>a</sup> |         | Invasive ventilation |         | Death            |         | Death after mechanical ventilation <sup>a</sup> |         | Death after invasive ventilation |         |
|-------|-----------|-------------------------------------|---------|----------------------|---------|------------------|---------|-------------------------------------------------|---------|----------------------------------|---------|
|       |           | aHR (95% CI)                        | P value | aHR (95% CI)         | P value | aHR (95% CI)     | P value | aHR (95% CI)                                    | P value | aHR (95% CI)                     | P value |
| HC    | Vs. No HC | 1.36 (0.78-2.39)                    | 0.28    | 1.15 (0.62-2.12)     | 0.66    | 0.99 (0.50-1.92) | 0.98    | 2.05 (0.64-6.55)                                | 0.23    | 1.88 (0.60-5.89)                 | 0.28    |
| HC+AZ |           | 1.14 (0.62-2.09)                    | 0.67    | 1.21 (0.65-2.30)     | 0.55    | 0.89 (0.45-1.77) | 0.74    | 2.01 (0.65-6.28)                                | 0.23    | 2.14 (0.67-6.86)                 | 0.20    |

Abbreviations: aHR, adjusted hazard ratio; HC, hydroxychloroquine; AZ, azithromycin; HR, hazard ratio  
<sup>a</sup> Mechanical ventilation includes both non-invasive and invasive mechanical ventilation

**Table S4: ICD-10-PCS and CPT codes used to define mechanical and invasive ventilation, related to STAR methods section “outcomes and exposure codes”**

|                                                             | <b>ICD-10-PCS</b>                                                                                                                                                                                                                                                                                                     | <b>CPT</b>                              |
|-------------------------------------------------------------|-----------------------------------------------------------------------------------------------------------------------------------------------------------------------------------------------------------------------------------------------------------------------------------------------------------------------|-----------------------------------------|
| Mechanical Ventilation (Noninvasive + Invasive ventilation) | 5A09557; 5A09558;<br>5A09559; 5A0955B;<br>5A0955Z; 5A09457;<br>5A09458; 5A09459;<br>5A0945B; 5A0945Z;<br>5A09357; 5A09358;<br>5A09359; 5A0935B;<br>5A0935Z; Z99.11;<br>0BH13EZ; 0BH17EZ;<br>0BH18EZ; 5A1935Z;<br>5A1945Z; 5A1955Z;<br>0B110F4; 0B110Z4;<br>0B113F4; 0B113Z4;<br>0B114F4; 0B114Z4;<br>09HN7BZ; 09HN8BZ | 31500; 94660;<br>94662; 94002;<br>94003 |
| Invasive Ventilation                                        | 0BH13EZ; 0BH17EZ;<br>0BH18EZ; 5A1935Z;<br>5A1945Z; 5A1955Z;<br>0B110F4; 0B110Z4;<br>0B113F4; 0B113Z4;<br>0B114F4; 0B114Z4;<br>09HN7BZ; 09HN8BZ                                                                                                                                                                        | 31500                                   |
